# Supplementary material for: Factors favouring phytoplankton blooms in the northern Adriatic: towards the northern Adriatic empirical ecological model
Source: Copernicus journal article supplement (doi:10.5194/os-12-19-2016), 2016-01-15
Supplement: Supplementary file 1 [file os-12-19-2016-supplement.pdf]

Supplement of Ocean Sci., 12, 19–37, 2016  
<http://www.ocean-sci.net/12/19/2016/>  
doi:10.5194/os-12-19-2016-supplement  
© Author(s) 2016. CC Attribution 3.0 License.

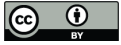

*Supplement of*

## **Factors favouring phytoplankton blooms in the northern Adriatic: towards the northern Adriatic empirical ecological model**

**R. Kraus et al.**

*Correspondence to:* N. Supić (supic@cim.irb.hr)

The copyright of individual parts of the supplement might differ from the CC-BY 3.0 licence.

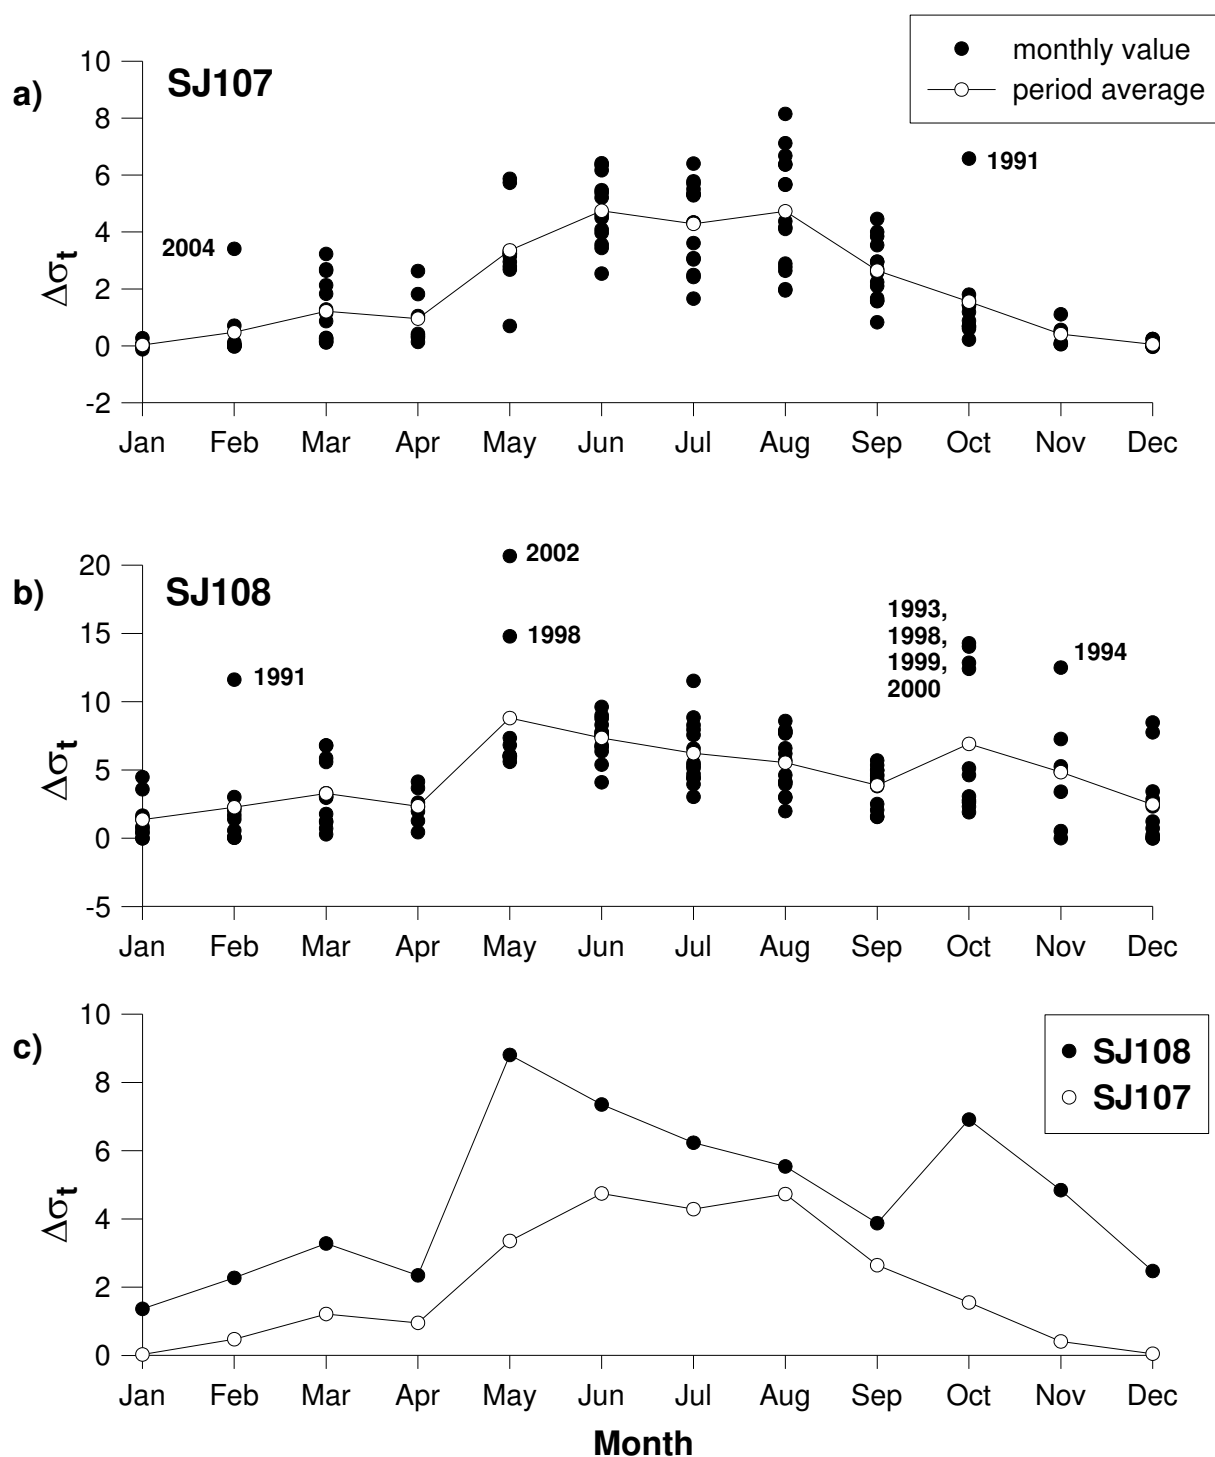

1  
 2 Suppl. Monthly distribution of stratification degree ( $\sigma_t$  at surface -  $\sigma_t$  at bottom) measured  
 3 during the 1990-2004 period at: a) SJ107 (in the eastern part of the Po River – Rovinj profile),  
 4 b) SJ108 (in the western part) and c) comparison of monthly averages of stratification degree  
 5 at SJ107 and SJ108. Values at a) and b) presented in black, averages in white circles.
